# Supplementary material for: Synthesis, crystal structure, photocatalysis, photocurrent response: one-dimensional K2HgSnSe4 and three-dimensional Na6Cu8Sn3Se13
Source: Royal Society of Chemistry journal article supplement (doi:10.1039/d1ce00821h), 2021-01-01
Supplement: d1ce00821h1.pdf [file d1ce00821h1.pdf]

# Synthesis, crystal structure, photocatalysis, photocurrent response: one-dimensional $\text{K}_2\text{HgSnSe}_4$ and three-dimensional $\text{Na}_6\text{Cu}_8\text{Sn}_3\text{Se}_{13}$

Gele Teri,<sup>a</sup> Na Li,<sup>a</sup> Sagala Bai,<sup>a</sup> Namila E,<sup>a</sup> and Menghe Baiyin<sup>\*a</sup>

(College of Chemistry & Environmental Science, Inner Mongolia Normal University, Hohhot, Inner Mongolia 010022, P. R. China)

<sup>\*a</sup> E-mail: baiymh@imnu.edu.cn

## Contents:

Table S1. Selected bond lengths [Å] and angles [°] for **1**.

Table S2. Selected bond lengths [Å] and angles [°] for **2**.

Figure S1. SEM-EDS analysis of compounds **1** and **2**.

Figure S2. Simulated and experimental power XRD patterns of compounds **1** and **2**.

Figure S3. UV-vis reflectance spectra of compounds **1** and **2**.

Figure S4. DTA analysis of compounds **1** and **2**.

Figure S5. Photoluminescence spectra of compounds **1** and **2**.

---

<sup>\*a</sup> Corresponding author.  
E-mail address: baiymh@imnu.edu.cn.

Table S1 Selected bond lengths (Å) and angles (°) for compound K<sub>2</sub>HgSnSe<sub>4</sub> (1)

|                                         |            |                                          |            |
|-----------------------------------------|------------|------------------------------------------|------------|
| Se1-Sn1 <sup>4</sup>                    | 2.620(5)   | Se1 <sup>4</sup> -Hg1-Se1 <sup>8</sup>   | 116.10(10) |
| Hg1-Se1 <sup>11</sup>                   | 2.620(5)   | Se1 <sup>4</sup> -Hg1-Se1                | 96.91(18)  |
| Hg1-Se1 <sup>8</sup>                    | 2.620(5)   | Se1 <sup>8</sup> -Hg1-Se1 <sup>11</sup>  | 116.09(10) |
| Hg2-Se1 <sup>4</sup>                    | 2.620(5)   | Se1 <sup>8</sup> -Hg1-Hg1 <sup>14</sup>  | 48.45(9)   |
| Hg3-Hg1 <sup>4</sup>                    | 3.4751(4)  | Se1 <sup>4</sup> -Hg1-Hg1 <sup>14</sup>  | 131.54(9)  |
| Hg4-Hg1 <sup>14</sup>                   | 3.4751(4)  | Se1 <sup>4</sup> -Hg1-Hg1 <sup>4</sup>   | 48.45(9)   |
| Hg5-Se1 <sup>11</sup>                   | 2.620(5)   | Se1-Hg1-Hg1 <sup>14</sup>                | 131.55(9)  |
| Hg6-Se1 <sup>8</sup>                    | 2.620(5)   | Se1-Hg1-Hg1 <sup>4</sup>                 | 48.46(9)   |
| Hg7-Se1 <sup>4</sup>                    | 2.620(5)   | Se1 <sup>11</sup> -Hg1-Hg1 <sup>4</sup>  | 131.55(9)  |
| Hg1-Se1-Hg1 <sup>4</sup>                | 83.09(18)  | Se1 <sup>11</sup> -Hg1-Hg1 <sup>14</sup> | 48.46(9)   |
| Hg1-Se1-Sn1 <sup>4</sup>                | 83.09(18)  | Se1 <sup>8</sup> -Hg1-Hg1 <sup>4</sup>   | 131.54(9)  |
| Sn1-Se1-Hg1                             | 0          | Hg1 <sup>4</sup> -Hg1-Hg1 <sup>14</sup>  | 180        |
| Sn14-Se1-Hg1 <sup>4</sup>               | 0          | Se1 <sup>4</sup> -Sn1-Se1 <sup>11</sup>  | 116.09(10) |
| Sn1-Se1-Hg1 <sup>4</sup>                | 83.09(18)  | Se1 <sup>8</sup> -Sn1-Se1 <sup>11</sup>  | 96.91(18)  |
| Sn1-Se1-Sn1 <sup>4</sup>                | 83.09(18)  | Se1-Sn1-Se1 <sup>11</sup>                | 116.09(10) |
| Se1 <sup>4</sup> -Hg1-Se1 <sup>11</sup> | 116.09(10) | Se1 <sup>4</sup> -Sn1-Se1 <sup>8</sup>   | 116.10(10) |
| Se1 <sup>8</sup> -Hg1-Se1 <sup>11</sup> | 96.91(18)  | Se1 <sup>4</sup> -Sn1-Se1                | 96.91(18)  |
| Se1-Hg1-Se1 <sup>11</sup>               | 116.09(10) | Se1 <sup>8</sup> -Sn1-Se1                | 116.09(10) |

Table S2 Selected bond lengths (Å) and angles (°) for compound Na<sub>6</sub>Cu<sub>8</sub>Sn<sub>3</sub>Se<sub>13</sub> (2)

|                                           |            |                                            |           |
|-------------------------------------------|------------|--------------------------------------------|-----------|
| Sn01-Se03                                 | 2.5392(13) | Se03 <sup>10</sup> -Cu04-Cu04 <sup>9</sup> | 106.19(4) |
| Sn01-Se03 <sup>1</sup>                    | 2.5392(13) | Se03 <sup>10</sup> -Cu04-Cu04 <sup>3</sup> | 52.37(5)  |
| Sn01-Se03 <sup>2</sup>                    | 2.5392(13) | Se03-Cu04-Cu04 <sup>9</sup>                | 137.84(4) |
| Sn01-Se03 <sup>3</sup>                    | 2.5392(13) | Cu04 <sup>9</sup> -Cu04-Cu04 <sup>3</sup>  | 90.003(1) |
| Se02-Cu04                                 | 2.555(2)   | Cu04 <sup>9</sup> -Cu04-Cu04 <sup>4</sup>  | 90.003(1) |
| Se02-Cu04 <sup>4</sup>                    | 2.555(2)   | Cu04 <sup>3</sup> -Cu04-Cu04 <sup>4</sup>  | 90        |
| Se02-Cu04 <sup>5</sup>                    | 2.555(2)   | Se03-Sn01-Se03 <sup>1</sup>                | 106.50(3) |
| Se02-Cu04 <sup>3</sup>                    | 2.555(2)   | Se03 <sup>1</sup> -Sn01-Se03 <sup>2</sup>  | 115.60(6) |
| Se02-Cu04 <sup>6</sup>                    | 2.555(2)   | Se03-Sn01-Se03 <sup>2</sup>                | 106.50(3) |
| Se02-Cu04 <sup>7</sup>                    | 2.555(2)   | Se03 <sup>1</sup> -Sn01-Se03 <sup>3</sup>  | 106.50(3) |
| Se02-Cu04 <sup>8</sup>                    | 2.555(2)   | Se03-Sn01-Se03 <sup>3</sup>                | 115.60(6) |
| Se02-Cu04 <sup>9</sup>                    | 2.555(2)   | Se03 <sup>2</sup> -Sn01-Se03 <sup>3</sup>  | 106.50(3) |
| Se03-Cu04 <sup>9</sup>                    | 2.4157(11) | Cu04 <sup>3</sup> -Se02-Cu04 <sup>4</sup>  | 109.5     |
| Se03-Cu04 <sup>9</sup>                    | 2.4158(11) | Cu04-Se02-Cu04 <sup>4</sup>                | 70.5      |
| Cu04-Cu04 <sup>6</sup>                    | 2.950(3)   | Cu04 <sup>5</sup> -Se02-Cu04 <sup>6</sup>  | 70.5      |
| Cu04-Cu04 <sup>3</sup>                    | 2.950(3)   | Cu04 <sup>7</sup> -Se02-Cu04 <sup>8</sup>  | 109.5     |
| Cu04-Cu04 <sup>9</sup>                    | 2.950(3)   | Cu04 <sup>7</sup> -Se02-Cu04 <sup>4</sup>  | 70.5      |
| Cu04-Se02-Cu04 <sup>7</sup>               | 109.5      | Cu04 <sup>5</sup> -Se02-Cu04 <sup>8</sup>  | 70.5      |
| Cu04 <sup>9</sup> -Se02-Cu04 <sup>6</sup> | 70.5       | Cu04-Se02-Cu04 <sup>8</sup>                | 109.5     |
| Cu04 <sup>6</sup> -Se02-Cu04 <sup>8</sup> | 109.5      | Cu04 <sup>5</sup> -Se02-Cu04 <sup>4</sup>  | 109.5     |
| Cu04-Se03-Sn01                            | 99.15(4)   | Cu04 <sup>5</sup> -Se02-Cu04 <sup>3</sup>  | 109.5     |

|                                            |           |                                           |           |
|--------------------------------------------|-----------|-------------------------------------------|-----------|
| Cu04 <sup>4</sup> -Se03-Sn01               | 99.15(4)  | Cu04 <sup>3</sup> -Se02-Cu04 <sup>6</sup> | 70.5      |
| Cu04 <sup>4</sup> -Se03-Cu04               | 75.27(11) | Cu04 <sup>9</sup> -Se02-Cu04 <sup>7</sup> | 180.00(5) |
| Se02-Cu04-Cu04 <sup>9</sup>                | 54.7      | Cu04 <sup>7</sup> -Se02-Cu04 <sup>6</sup> | 109.5     |
| Se02-Cu04-Cu04 <sup>3</sup>                | 54.7      | Cu04-Se02-Cu04 <sup>5</sup>               | 180       |
| Se02-Cu04-Cu04 <sup>4</sup>                | 54.7      | Cu04 <sup>9</sup> -Se02-Cu04 <sup>8</sup> | 70.5      |
| Se03 <sup>10</sup> -Cu04-Se02              | 103.68(6) | Cu04 <sup>9</sup> -Se02-Cu04 <sup>5</sup> | 109.5     |
| Se03 <sup>11</sup> -Cu04-Se02              | 103.68(6) | Cu04 <sup>9</sup> -Se02-Cu04 <sup>4</sup> | 109.5     |
| Se03-Cu04-Se02                             | 103.68(6) | Cu04 <sup>7</sup> -Se02-Cu04 <sup>5</sup> | 70.5      |
| Se03 <sup>11</sup> -Cu04-Se03              | 114.59(4) | Cu04 <sup>4</sup> -Se02-Cu04 <sup>8</sup> | 70.5      |
| Se03 <sup>11</sup> -Cu04-Se03              | 114.59(4) | Cu04-Se02-Cu04 <sup>3</sup>               | 70.5      |
| Se03 <sup>10</sup> -Cu04-Se03              | 114.59(4) | Cu04 <sup>6</sup> -Se02-Cu04 <sup>4</sup> | 180.00(5) |
| Se03 <sup>11</sup> -Cu04-Cu04 <sup>3</sup> | 137.84(4) | Cu04 <sup>9</sup> -Se02-Cu04 <sup>3</sup> | 109.5     |
| Se03 <sup>10</sup> -Cu04-Cu04 <sup>4</sup> | 137.84(4) | Cu04-Se02-Cu04 <sup>9</sup>               | 70.5      |
| Se03-Cu04-Cu04 <sup>3</sup>                | 106.19(4) | Cu04 <sup>7</sup> -Se02-Cu04 <sup>3</sup> | 70.5      |
| Se03 <sup>11</sup> -Cu04-Cu04 <sup>4</sup> | 106.19(4) | Cu04 <sup>3</sup> -Se02-Cu04 <sup>8</sup> | 180       |
| Se03-Cu04-Cu04 <sup>4</sup>                | 52.37(5)  | Cu04-Se02-Cu04 <sup>6</sup>               | 109.5     |
| Se03 <sup>11</sup> -Cu04-Cu04 <sup>9</sup> | 52.37(5)  |                                           |           |

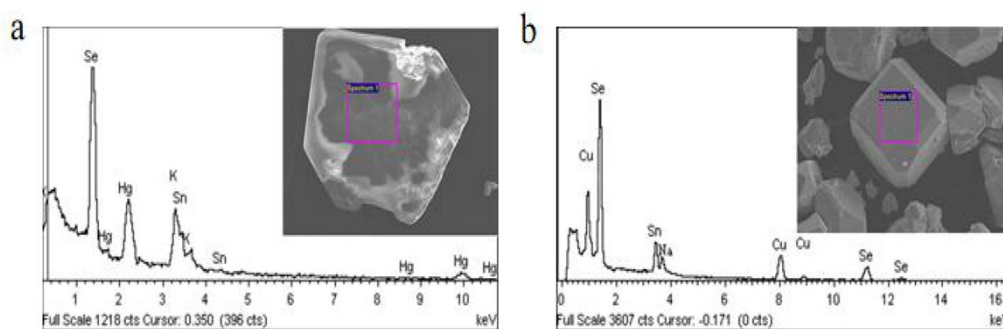

Figure S1. (a) SEM-EDS analysis of compound **1**; (b) SEM-EDS analysis of compound **2**.

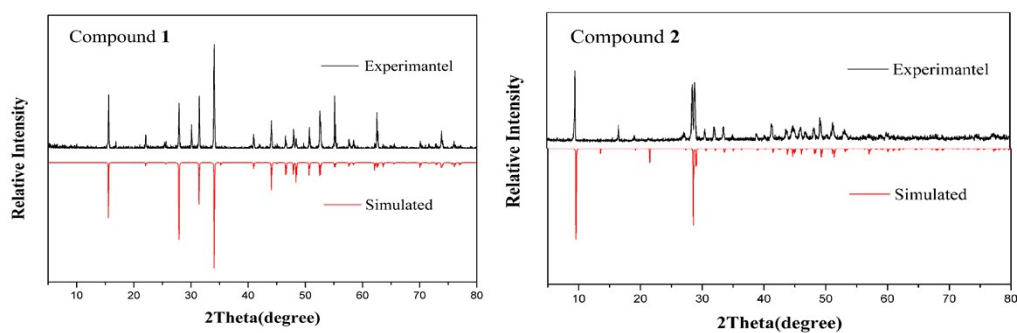

Figure S2. Simulated and experimental power XRD patterns of compounds **1** and **2**.

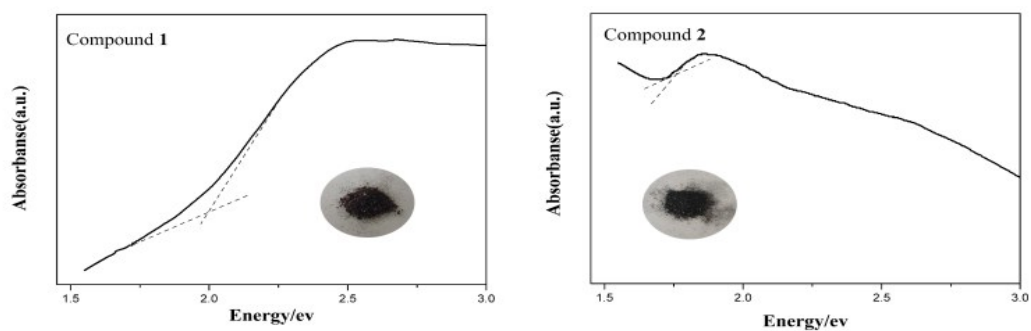

Figure S3. UV-vis reflectance spectra of compounds **1** and **2**.

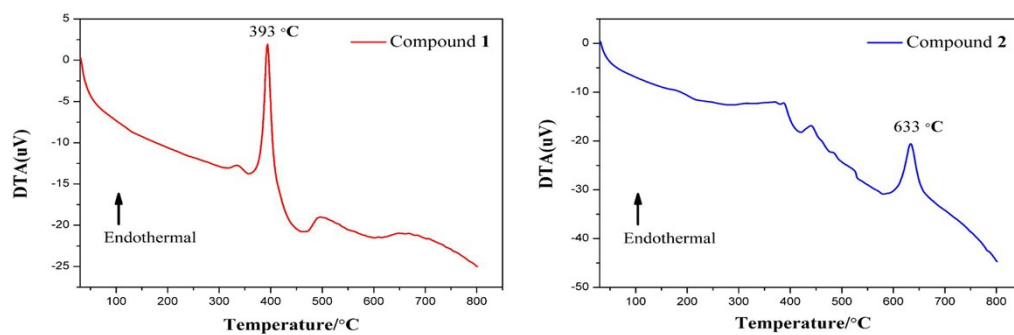

Figure S4. DTA analysis of compounds **1** and **2**.

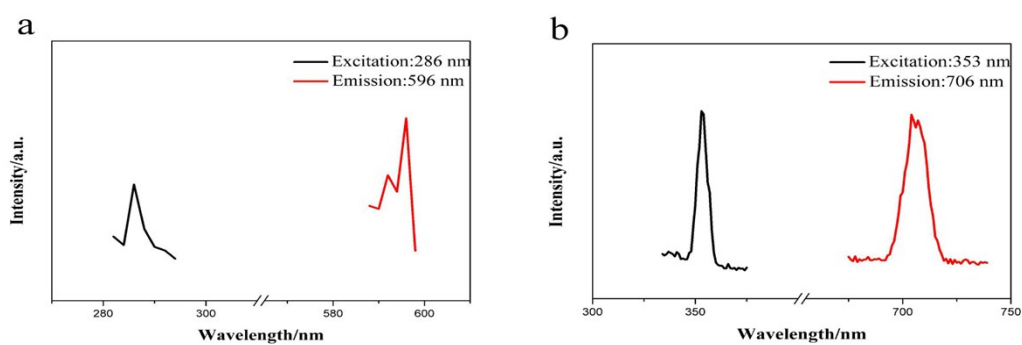

Figure S5. (a) Photoluminescence spectra of compound **1**;  
(b) Photoluminescence spectra of compound **2**.
